# Supplementary material for: A Systematic Review and Meta-Analysis Finds Increased Blood Levels of All Forms of Ghrelin in Both Restricting and Binge-Eating/Purging Subtypes of Anorexia Nervosa
Source: PubMed Central journal article supplement (PMC7926807; doi:10.3390/nu13020709), 2021-02-23
Supplement: nutrients-13-00709-s001.pdf [file nutrients-13-00709-s001.pdf]

## Supplementary material Seidel et al.

### 1.1. Search terms

#### PUBMED:

((("Anorexia"[Mesh] OR "Anorexia Nervosa"[Mesh] OR "Bulimia"[Mesh] OR "Bulimia Nervosa"[Mesh] OR "Binge-Eating Disorder"[Mesh] OR "Caloric Restriction"[Mesh]) OR ("eating disorder" OR "eating disorders" OR Anorexia OR " Anorexia nervosa" OR "Binge-eating disorder" OR "binge eating disorder" OR "Binge-eating disorders" OR "binge eating disorders" OR bulimia OR "Bulimia nervosa" OR "caloric restriction" OR "appetite disorder" OR "appetite disorders" OR "feeding disorder" OR "feeding disorders")) AND ((Ghrelin OR "GHRL Protein" OR Ppghrelin OR "Ghrelin-Obestatin Preprohormone" OR "Ghrelin Obestatin Preprohormone" OR "Motilin-Related Peptide Precursor" OR "Motilin Related Peptide Precursor" OR PpMTLRP OR "Ghrelin Precursor" OR Obestatin OR "Appetite-Regulating Hormone" OR "Appetite Regulating Hormone" OR "Motilin-Related Peptide" OR "Motilin Related Peptide" OR "Gastric MLTRP" OR acylghrelin OR "acyl Ghrelin" OR des-acylghrelin OR "des-acyl ghrelin") OR ("Ghrelin"[Mesh])))

#### Psycinfo

(Eating disorder OR eating disorders OR anorexia OR anorexia nervosa OR binge-eating disorder OR binge-eating disorders OR bulimia OR bulimia nervosa OR caloric restriction OR appetite disorder OR appetite disorders OR feeding disorder OR feeding disorders ) AND ( Ghrelin OR acylghrelin OR des-acylghrelin OR GHRL protein OR ppghrelin OR Ghrelin-obsestain preprohormone OR Motilin-related peptide precursor OR PpMTLRP OR Ghrelin Precursor )

#### Embase

1. ("eating disorder" or "eating disorders" or Anorexia or " Anorexia nervosa" or "Binge-eating disorder" or "binge eating disorder" or "Binge-eating disorders" or "binge eating disorders" or bulimia or "Bulimia nervosa" or "caloric restriction" or "appetite disorder" or "appetite disorders" or "feeding disorder" or "feeding disorders").mp. [mp=title, abstract, heading word, drug trade name, original title, device manufacturer, drug manufacturer, device trade name, keyword, floating subheading word, candidate term word]
2. exp anorexia/
3. exp anorexia nervosa/
4. exp eating disorder/
5. exp binge eating disorder/
6. exp bulimia/
7. exp caloric restriction/
8. exp appetite disorder/
9. exp feeding disorder/
10. 1 or 2 or 3 or 4 or 5 or 6 or 7 or 8 or 9
11. (Ghrelin or acylghrelin or des-acylghrelin or GHRL protein or ghrelin-obsestain preprohormone or motilin-related peptide precursor or PpMTLRP or ghrelin precursor).mp. [mp=title, abstract, heading word, drug trade name, original title, device manufacturer, drug manufacturer, device trade name, keyword, floating subheading word, candidate term word]
12. exp ghrelin/
13. 11 or 12
14. 10 and 13

**Table S1: In an exclusion criteria for selection of studies**

| <b>Inclusion criteria</b> | <b>Exclusion criteria</b>                         |
|---------------------------|---------------------------------------------------|
| Anorexia nervosa          | Review                                            |
| Ghrelin                   | No available ghrelin data                         |
| Acyl ghrelin              | Case report                                       |
| Desacyl ghrelin           | No access through the University of Copenhagen    |
| Adults or adolescents     | Non-English papers<br>Animal research<br>In vitro |

**Table S2: Data extraction template**

| <b>Data extracted</b> |
|-----------------------|
| Author name           |
| Year                  |
| Sample size AN and HC |
| Design type           |
| Diagnostic criteria   |
| Intervention type     |
| AN subtype            |
| Ghrelin total         |
| Ghrelin acyl          |
| Ghrelin desacyl       |
| Ghrelin unit          |
| Assay type            |
| Age: AN and HC        |
| BMI: AN and HC        |

**Table S3: Risk of bias assessment through Cochrane Collaboration:**

| <b>Cochrane Collaborations tool for assessing risk of bias</b> | <b>Selection bias<br/>Random sequence generation</b> | <b>Selection bias<br/>Allocation concealment</b> | <b>Performance bias<br/>Blinding of participants and personnel</b> | <b>Detection bias<br/>Blinding of outcome assessment</b> | <b>Attrition bias<br/>Incomplete outcome data</b> | <b>Reporting bias<br/>Selective reporting</b> | <b>Other bias</b> | <b>Total bias assessment:</b> |
|----------------------------------------------------------------|------------------------------------------------------|--------------------------------------------------|--------------------------------------------------------------------|----------------------------------------------------------|---------------------------------------------------|-----------------------------------------------|-------------------|-------------------------------|
| <b>Brambilla et al, 2007</b>                                   | Unclear risk                                         | Low risk                                         | Low risk                                                           | Low risk                                                 | Low risk                                          | Low risk                                      | -                 | Low risk = high quality       |
| <b>Grinspoon et al, 2004</b>                                   | Low risk                                             | Low risk                                         | Low risk                                                           | Unclear risk                                             | Low risk                                          | Low risk                                      | -                 | Low risk = High quality       |
| <b>Fazeli et al, 2018</b>                                      | Low risk                                             | Unclear risk                                     | Low risk                                                           | Unclear risk                                             | Unclear risk                                      | Low risk                                      |                   | Low risk = High quality       |

**Table S4: Quality assessment using Newcastle-Ottawa Quality Assessment Scale (NOS) (cross-sectional studies)**

|                                                                     | Selection                          |                   |                              |                                  | Comparability                          |                                    |                                               | Outcome          | Total score: |
|---------------------------------------------------------------------|------------------------------------|-------------------|------------------------------|----------------------------------|----------------------------------------|------------------------------------|-----------------------------------------------|------------------|--------------|
| Newcastle-Ottawa Quality Assessment Scale (Cross-sectional studies) | 1. Representativeness of the cases | 2. Sample size    | 3. Ascertainment of exposure | 4. Non-response rate             | 5. Comparability of cases and controls | 6. Assessment of outcome           | 7. Follow-up long enough for outcome to occur | Quality of study |              |
| <b>Bernadoni et al, 2020</b>                                        | A (Non-random sampling) *          | A (justified) *   | A (validated) *              | A (comparability satisfactory) * | A (Age) *                              | A (independent blind assessment) * | A (Statistical test appropriate) *            | 7                |              |
| <b>Breithaupt et al, 2020</b>                                       | A (Non-random sampling) *          | A (justified) *   | A (validated) *              | A (comparability satisfactory) * | None                                   | A (independent blind assessment) * | A (Statistical test appropriate) *            | 6                |              |
| <b>Broglia et al, 2004</b>                                          | A (non-random sampling) *          | B (not justified) | A (validated) *              | A (comparability satisfactory) * | None                                   | A (independent blind assessment) * | A (Statistical test appropriate) *            | 5                |              |
| <b>Duriez et al, 2020</b>                                           | A (non-random sampling) *          | A (justified) *   | A (validated) *              | A (comparability satisfactory) * | None                                   | A (independent blind assessment) * | A (Statistical test appropriate) *            | 6                |              |
| <b>Fernandez-Aranda et al., 2016</b>                                | A (non-random sampling) *          | A (justified) *   | A (validated) *              | A (comparability satisfactory) * | A (Age) *                              | A (independent blind assessment) * | A (Statistical test appropriate) *            | 7                |              |
| <b>Germain et al, 2007</b>                                          | A (Non-random sampling) *          | B (not justified) | A (validated) *              | A (comparability satisfactory) * | A (Age) *                              | A (independent blind assessment) * | A (Statistical test appropriate) *            | 6                |              |
| <b>Germain et al, 2009</b>                                          | A (Non-random sampling) *          | B (not justified) | A (validated) *              | A (comparability satisfactory) * | A (Age) *                              | A (independent blind assessment) * | A (Statistical test appropriate) *            | 6                |              |
| <b>Haas et al, 2005</b>                                             | A (Non-random sampling) *          | A (justified) *   | A (validated) *              | A (comparability satisfactory) * | A (Age) *                              | A (independent blind assessment) * | A (Statistical test appropriate) *            | 8                |              |
| <b>Harada et al, 2008</b>                                           | B (Non-random sampling)            | B (not justified) | A (validated) *              | A (comparability satisfactory) * | None                                   | A (independent blind assessment) * | A (Statistical test appropriate) *            | 4                |              |
| <b>Heruc et al, 2019</b>                                            | A (Non-random sampling) *          | B (not justified) | A (validated) *              | A (comparability satisfactory) * | A (Age) *                              | A (independent blind assessment) * | A (Statistical test appropriate) *            | 6                |              |
| <b>Holsen et al, 2014</b>                                           | A (Non-random sampling) *          | B (not justified) | A (validated) *              | A (comparability satisfactory) * | None                                   | A (independent blind assessment) * | A (Statistical test appropriate) *            | 5                |              |
| <b>Hotta et al, 2004.</b>                                           | B ( non-random sampling)           | A (justified) *   | A (validated) *              | A (comparability satisfactory) * | A (Age) *                              | A (independent blind assessment) * | A (Statistical test appropriate) *            | 6                |              |
| <b>Korek et al, 2013</b>                                            | B ( non-random sampling)           | B (not justified) | A (validated) *              | A (comparability satisfactory) * | None                                   | A (independent blind assessment) * | A (Statistical test appropriate) *            | 4                |              |
| <b>Koyama et al, 2010</b>                                           | A (Non-random sampling) *          | B (not justified) | A (validated) *              | A (comparability satisfactory) * | A (Age) *                              | A (independent blind assessment) * | A (Statistical test appropriate) *            | 6                |              |

|                                |                                                            |                                  |           |                                    |                                      |   |
|--------------------------------|------------------------------------------------------------|----------------------------------|-----------|------------------------------------|--------------------------------------|---|
| <b>Krsek et al, 2003</b>       | A (Non-random sampling)* B (not justified) A (validated) * | A (comparability satisfactory) * | None      | A (independent blind assessment) * | A (Statistical test appropriate) *   | 5 |
| <b>Lanyi et al, 2012</b>       | A (Non-random sampling)* B (not justified) A (validated) * | A (comparability satisfactory) * | None      | A (independent blind assessment) * | A (Statistical test appropriate) *   | 5 |
| <b>Lawson et al, 2011</b>      | A (Non-random sampling)* B (not justified) A (validated) * | A (comparability satisfactory) * | None      | A (independent blind assessment) * | A (Statistical test appropriate) *   | 5 |
| <b>Manusco et al, 2020</b>     | A (Non-random sampling)* A (justified) * A (validated) *   | A (comparability satisfactory) * | None      | A (independent blind assessment) * | A (Statistical test appropriate) *   | 6 |
| <b>Misra et al, 2008</b>       | A (Non-random sampling) *A (justified) * A (validated) *   | A (comparability satisfactory) * | A (Age) * | A (independent blind assessment) * | A (Statistical test appropriate) *   | 7 |
| <b>Monteleone et al, 2008a</b> | A (Non-random sampling) *B (not justified) A (validated) * | A (comparability satisfactory) * | None      | A (independent blind assessment) * | A (Statistical test appropriate) *   | 5 |
| <b>Monteleone et al, 2008b</b> | A (Non-random sampling) *B (not justified) A (validated) * | A (comparability satisfactory) * | A (Age) * | A (independent blind assessment) * | A (Statistical test appropriate) *   | 6 |
| <b>Monteleone et al, 2016</b>  | A (Non-random sampling) *B (not justified) A (validated) * | A (comparability satisfactory) * | None      | A (independent blind assessment) * | A (Statistical test appropriate) *   | 5 |
| <b>Nakahara et al, 2007</b>    | A (Non-random sampling) *B (not justified) A (validated) * | A (comparability satisfactory) * | A (Age) * | A (independent blind assessment) * | A (Statistical test appropriate) *   | 6 |
| <b>Nakahara et al, 2008</b>    | A (Non-random sampling) *B (not justified) A (validated) * | A (comparability satisfactory) * | A (Age) * | A (independent blind assessment) * | A (Statistical test appropriate) *   | 6 |
| <b>Nakai et al, 2003</b>       | A (Non-random sampling) *B (not justified) A (validated) * | A (comparability satisfactory) * | A (Age) * | A (independent blind assessment) * | A (Statistical test appropriate) *   | 6 |
| <b>Nedvidkova et al, 2003</b>  | A (Non-random sampling) *B (not justified) A (validated) * | A (comparability satisfactory) * | None      | A (independent blind assessment) * | A (Statistical test appropriate) *   | 5 |
| <b>Nogueira et al, 2013</b>    | A (Non-random sampling) *B (not justified) A (validated) * | A (comparability satisfactory) * | None      | A (independent blind assessment) * | A (Statistical test appropriate) *   | 5 |
| <b>Ogiso et al, 2011</b>       | A (Non-random sampling) *B (not justified) A (validated) * | A (comparability satisfactory) * | A (Age) * | A (independent blind assessment) * | A (Statistical test appropriate) *   | 6 |
| <b>Otto et al, 2001</b>        | A (Non-random sampling) *A (justified) * A (validated) *   | A (comparability satisfactory) * | A (Age) * | A (independent blind assessment) * | A (Statistical test appropriate) *   | 7 |
| <b>Paslakis et al, 2019</b>    | A (Non-random sampling) *A (justified) * A (validated) *   | A (comparability satisfactory) * | None      | A (independent blind assessment) * | A (Statistical test appropriate) *   | 6 |
| <b>Rigamonti et al, 2002</b>   | A (Non-random sampling) *B (not justified) A (validated) * | A (comparability satisfactory) * | None      | A (independent blind assessment) * | A (Statistical test not appropriate) | 4 |
| <b>Simon et al., 2020</b>      | A (Non-random sampling) *A (justified) * A (Yes) *         | A (comparability satisfactory) * | A (Age) * | A (independent blind assessment) * | A (Statistical test appropriate) *   | 7 |

|                                         |                                                             |                                  |                        |                                    |                                    |   |
|-----------------------------------------|-------------------------------------------------------------|----------------------------------|------------------------|------------------------------------|------------------------------------|---|
| <b>Soriano-Guille, 2004</b>             | A (Non-random sampling) * B (not justified) A (validated) * | A (comparability satisfactory) * | None                   | A (independent blind assessment) * | A (Statistical test appropriate) * | 5 |
| <b>Stengel et al., 2013</b>             | A (Non-random sampling) * B (not justified) A (validated) * | A (comparability satisfactory) * | BMI                    | A (independent blind assessment) * | A (Statistical test appropriate) * | 5 |
| <b>Stock et al, 2005</b>                | A (Non-random sampling) * B (not justified) A (validated) * | A (comparability satisfactory) * | None                   | A (independent blind assessment) * | A (Statistical test appropriate) * | 5 |
| <b>Stojilkovic-Drobnjak et al. 2019</b> | A (Non-random sampling) * B (not justified) A (validated) * | A (comparability satisfactory) * | A (BMI) *              | A (independent blind assessment) * | A (Statistical test appropriate) * | 6 |
| <b>Stoving et al, 2007</b>              | A (Non-random sampling) * A (justified) * A (validated) *   | A (comparability satisfactory) * | A (Age) *              | A (independent blind assessment) * | A (Statistical test appropriate) * | 7 |
| <b>Tanaka et al, 2003c</b>              | A (Non-random sampling) * B (not justified) A (validated) * | A (comparability satisfactory) * | A (Sex) *              | A (independent blind assessment) * | A (Statistical test appropriate) * | 6 |
| <b>Tanaka et al, 2004</b>               | A (Non-random sampling) * B (not justified) A (validated) * | A (comparability satisfactory) * | A (Age) *              | A (independent blind assessment) * | A (Statistical test appropriate) * | 6 |
| <b>Terashi et al, 2011</b>              | A (Non-random sampling) * B (not justified) A (validated) * | A (comparability satisfactory) * | None                   | A (independent blind assessment) * | A (Statistical test appropriate) * | 5 |
| <b>Terra et al, 2013</b>                | A (Non-random sampling) * B (not justified) A (validated) * | A (comparability satisfactory) * | A (Age) *              | A (independent blind assessment) * | A (Statistical test appropriate) * | 6 |
| <b>Tolle et al, 2003</b>                | A (Non-random sampling) * B (not justified) A (validated) * | A (comparability satisfactory) * | A (Age) *              | A (independent blind assessment) * | A (Statistical test appropriate) * | 6 |
| <b>Troisi et al, 2005</b>               | A (Non-random sampling) * B (not justified) A (validated) * | A (comparability satisfactory) * | A (Age) *<br>A (BMI) * | A (independent blind assessment) * | A (Statistical test appropriate) * | 7 |
| <b>Westwater et al, 2020</b>            | A (Non-random sampling) * B (not justified) A (validated) * | A (comparability satisfactory) * | None                   | A (independent blind assessment) * | A (Statistical test appropriate) * | 5 |
| <b>Wollenhaupt et al, 2019</b>          | A (Non-random sampling) * B (not justified) A (validated) * | A (comparability satisfactory) * | None                   | A (independent blind assessment) * | A (Statistical test appropriate) * | 5 |
| <b>Uehara et al, 2011</b>               | A (Non-random sampling) * B (not justified) A (validated) * | A (comparability satisfactory) * | A (Age) *              | A (independent blind assessment) * | A (Statistical test appropriate) * | 6 |
| <b>Zamrazilova et al, 2008</b>          | A (Non-random sampling) * B (not justified) A (validated) * | A (comparability satisfactory) * | A (Age) *              | A (independent blind assessment) * | A (Statistical test appropriate) * | 6 |

\* The asterisk is given when the item score meets a predefined criteria/level. The sum is given in the last column. The higher the score, the higher the quality of the study.

**Table S5: Overview of evidence level for included studies**

| <b>Study</b>                      | <b>Tool</b>            | <b>Evidence Level<br/>(Oxford CEMB)</b> | <b>Study design</b>                                |
|-----------------------------------|------------------------|-----------------------------------------|----------------------------------------------------|
| Bernardoni et al., 2020           | NOS                    | Level 3B                                | Cross-sectional study                              |
| Brambilla et al., 2007            | Cochrane collaboration | Level 1b                                | Randomized, double-blind placebo controlled design |
| Breithaupt et al., 2020           | NOS                    | Level 3B                                | Cross-sectional study                              |
| Broglio et al., 2004              | NOS                    | Level 3B                                | Cross-sectional study                              |
| Duriez et al., 2020               | NOS                    | Level 2b                                | Cohort study                                       |
| Fazeli et al., 2018               | Cochrane collaboration | Level 2b                                | Randomized controlled study                        |
| Fernandez-Aranda et al., 2016     | NOS                    | Level 3B                                | Cross-sectional study                              |
| Germain et al., 2007              | NOS                    | Level 3B                                | Cross-sectional study                              |
| Germain et al., 2009              | NOS                    | Level 3B                                | Cross-sectional study                              |
| Grinspoon et al., 2004            | Cochrane collaboration | Level 1B                                | Randomized controlled study                        |
| Haas et al., 2005                 | NOS                    | Level 3B                                | Cross-sectional study                              |
| Heruc et al., 2019                | NOS                    | Level 3B                                | Cross-sectional study                              |
| Harada et al., 2008               | NOS                    | Level 3B                                | Cross-sectional study                              |
| Holsen et al., 2014               | NOS                    | Level 3B                                | Cross-sectional study                              |
| Hotta et al., 2004                | NOS                    | Level 3B                                | Cross-sectional study                              |
| Korek et al., 2013                | NOS                    | Level 3B                                | Cross-sectional study                              |
| Koyama et al., 2010               | NOS                    | Level 3B                                | Cross-sectional study                              |
| Krsek et al., 2003                | NOS                    | Level 3B                                | Cross-sectional study                              |
| Lanyi et al., 2012                | NOS                    | Level 3B                                | Cross-sectional study                              |
| Lawson et al., 2011               | NOS                    | Level 3B                                | Cross-sectional study                              |
| Mancuso et al., 2020              | NOS                    | Level 3B                                | Cross-sectional study                              |
| Misra et al., 2008                | NOS                    | Level 3B                                | Cross-sectional study                              |
| Monteleone et al., 2008a          | NOS                    | Level 3B                                | Cross-sectional study                              |
| Monteleone et al., 2008b          | NOS                    | Level 3B                                | Cross-sectional study                              |
| Monteleone et al., 2016           | NOS                    | Level 3B                                | Cross-sectional study                              |
| Nakahara et al., 2007             | NOS                    | Level 3B                                | Cross-sectional study                              |
| Nakahara et al., 2008             | NOS                    | Level 3B                                | Cross-sectional study                              |
| Nakai et al., 2003                | NOS                    | Level 3B                                | Cross-sectional study                              |
| Nedvidkova et al., 2003           | NOS                    | Level 3B                                | Cross-sectional study                              |
| Nogueira et al., 2013             | NOS                    | Level 3B                                | Cross-sectional study                              |
| Ogiso et al., 2011                | NOS                    | Level 3B                                | Cross-sectional study                              |
| Otto et al., 2001                 | NOS                    | Level 3B                                | Cross-sectional study                              |
| Paslakis et al., 2019             | NOS                    | Level 3B                                | Cross-sectional study                              |
| Rigamonti et al., 2002            | NOS                    | Level 3B                                | Cross-sectional study                              |
| Simon et al., 2020                | NOS                    | Level 3B                                | Cross-sectional study                              |
| Soriano-Guille., 2003             | NOS                    | Level 3B                                | Cross-sectional study                              |
| Stengel et al., 2013              | NOS                    | Level 3B                                | Cross-sectional study                              |
| Stock et al., 2005                | NOS                    | Level 3B                                | Cross-sectional study                              |
| Stojilkovic-Drobnjak et al., 2019 | NOS                    | Level 3B                                | Cross-sectional study                              |
| Stoving et al., 2007              | NOS                    | Level 3B                                | Cross-sectional study                              |
| Tanaka et al., 2003c              | NOS                    | Level 3B                                | Cross-sectional study                              |
| Tanaka et al., 2004               | NOS                    | Level 3B                                | Cross-sectional study                              |
| Terra et al., 2013                | NOS                    | Level 3B                                | Cross-sectional study                              |
| Tolle et al., 2003                | NOS                    | Level 3B                                | Cross-sectional study                              |
| Troisi et al., 2005               | NOS                    | Level 3B                                | Cross-sectional study                              |
| Uehara et al., 2011               | NOS                    | Level 3B                                | Cross-sectional study                              |
| Westwater, 2020                   | NOS                    | Level 3B                                | Cross-sectional study                              |
| Wollenhaupt et al., 2019          | NOS                    | Level 3B                                | Cross-sectional study                              |
| Zamrazilova et al., 2008          | NOS                    | Level 3B                                | Cross-sectional study                              |

**Table S6: Reasons for excluding specific papers**

| <b>Study</b>               | <b>Titel</b>                                                                                                                                 | <b>Reason</b>                   |
|----------------------------|----------------------------------------------------------------------------------------------------------------------------------------------|---------------------------------|
| Baker et al. 2019          | Correlation between gene expression change and hormone change during refeeding in Anorexia nervosa                                           | Conference abstract             |
| Baker et al. 2020          | Metabolic Predictors of Length of Stay on an Eating Disorder Inpatient Unit                                                                  | Conference abstract             |
| Baskeran et al. 2016       | Leptin secretory dynamics and associated disordered eating psychopathology across the weight spectrum                                        | Overlap with Lawson et al. 2011 |
| Beranova et al 2009        | Neuropeptide Y, ghrelin and leptin plasma levels in anorexia nervosa patients and their changes during six-week refeeding                    | Non-English                     |
| Briatore et al. 2006       | Acute plasma glucose increase, but not early insulin response, regulates plasma ghrelin                                                      | Wrong population                |
| Bulant etl al. 2020        | Changes of BMI, steroid metabolome and psychopathology in patients with anorexia nervosa during hospitalization                              | Reported values not accessible  |
| Galmiche et al. 2020       | Plasma Peptide Concentrations and Peptide-Reactive Immunoglobulins in Patients with Eating Disorders at Inclusion in the French EDILS Cohort | No control group/ No follow-up  |
| Germain et al 2010         | Somatic and psychological factors related to the body mass index of patients with anorexia nervosa                                           | Overlap Germain et al. 2009     |
| Germain et al. 2016        | Interleukin-7 plasma levels in human differentiate anorexia nervosa, constitutional thinness and healthy obesity                             | Wrong outcome                   |
| Goebel-Stengel et al. 2013 | The ghrelin activating enzyme ghrelin-O-acyltransferase (GOAT) is present in human plasma and expressed dependent on body mass index         | Overlap Stengel et al. 2013     |
| Hofmann et al 2016         | Plasma kisspeptin and ghrelin levels are independently correlated with physical activity in patients with anorexia nervosa                   | No control group                |
| Holsen et al. 2012         | Subcortical food motivation circuitry dysfunction associated with endogenous active ghrelin levels in women with anorexia nervosa            | Conference abstract             |
| Hotta et al. 2009          | Ghrelin Increases Hunger and Food Intake in Patients with Restricting-type Anorexia Nervosa: A Pilot Study                                   | No control group                |



|                                   |                                                                                                                                                                                               |                                                                                     |
|-----------------------------------|-----------------------------------------------------------------------------------------------------------------------------------------------------------------------------------------------|-------------------------------------------------------------------------------------|
| Hotta et al. 2012                 | Therapeutic potential of ghrelin in restricting-type anorexia nervosa                                                                                                                         | Overlap with Hotta et al. 2004                                                      |
| Janas-Kosik et al. 2007           | Total ghrelin plasma level in patients with the restrictive type of anorexia nervosa                                                                                                          | Reported values not accessible                                                      |
| Janas-Kozik et al. 2006           | The plasma levels of orexigenic peptides and human platelets phospholipase D activity in anorexia nervosa patients                                                                            | Non-English                                                                         |
| Janas-Kozik et al. 2011           | Plasma levels of leptin and orexin A in the restrictive type of anorexia nervosa                                                                                                              | Wrong outcome                                                                       |
| Karczewska-Kupczewska et al. 2010 | Increased suppression of serum ghrelin concentration by hyperinsulinemia in women with anorexia nervosa                                                                                       | Reported values not accessible                                                      |
| Kawai et al. 2008                 | Somatic and psychological factors related to the body mass index of patients with anorexia nervosa                                                                                            | No control group                                                                    |
| Kawai et al., 2017                | Ghrelin activation and neuropeptide Y elevation in response to medium chain triglyceride administration in anorexia nervosa patients                                                          | No control group, not clear which nutritional supplement condition is "normal food" |
| Lawson et al., 2012               | Subcortical food motivation circuitry dysfunction associated with endogenous active ghrelin levels in women with anorexia nervosa                                                             | Overlap Lawson et al. 2011                                                          |
| Lofrano-Prado et al., 2016        | Non-traditional biomarkers of eating disorder symptoms among female college students                                                                                                          | Wrong population                                                                    |
| Miljic et al., 2006               | Ghrelin has partial or no effect on appetite, growth hormone, prolactin, and cortisol release in patients with anorexia nervosa                                                               | No control group                                                                    |
| Miljic et al., 2007               | Glucose metabolism during ghrelin infusion in patients with anorexia nervosa                                                                                                                  | No control group                                                                    |
| Misra et al. 2005a                | Secretory dynamics of ghrelin in adolescent girls with anorexia nervosa and healthy adolescents                                                                                               | Wrong outcome                                                                       |
| Misra et al., 2005b               | Ghrelin and bone metabolism in adolescent girls with anorexia nervosa and healthy adolescents                                                                                                 | Wrong outcome                                                                       |
| Misra et al., 2005c               | Secretory dynamics of leptin in adolescent girls with anorexia nervosa and healthy adolescents                                                                                                | Wrong outcome                                                                       |
| Otto et al. 2005                  | Postprandial ghrelin release in anorectic patients before and after weight gain                                                                                                               | Overlap Otto et al. 2001                                                            |
| Plessow et al., 2018              | Postprandial changes in ghrelin levels are associated with subsequent hedonic food intake and activation in the food reward pathway in healthy controls but not females with anorexia nervosa | Conference abstract                                                                 |

|                         |                                                                                                                                                                 |                                |
|-------------------------|-----------------------------------------------------------------------------------------------------------------------------------------------------------------|--------------------------------|
| Ramoz et al. 2017       | Genetic and neuroendocrinological biomarkers in anorexia nervosa and relatives                                                                                  | Conference abstract            |
| Ramoz et al. 2018       | Neuropeptide concentrations and epigenetic profiles of patients who remitted from anorexia nervosa: Prognostic biomarkers?                                      | Conference abstract            |
| Ramoz et al., 2015      | Hunger and satiety signals in anorexia nervosa: Neuroendocrinological and genetic analyses                                                                      | Conference abstract            |
| Schneider et al., 2008  | Effects of age, malnutrition and refeeding on the expression and secretion of ghrelin                                                                           | Wrong population               |
| Sedlackova et al., 2011 | Changes of plasma obestatin, ghrelin and NPY in anorexia and bulimia nervosa patients before and after a high-carbohydrate breakfast                            | Reported values not accessible |
| Sedlackova et al., 2012 | Comparison of a high-carbohydrate and high-protein breakfast effect on plasma ghrelin, obestatin, NPY and PYY levels in women with anorexia and bulimia nervosa | Reported values not accessible |
| Shiyya et al., 2002     | Plasma Ghrelin Levels in Lean and Obese Humans and the Effect of Glucose on Ghrelin Secretion                                                                   | Reported values not accessible |
| Stachowicz et al., 2011 | The roles of ghrelin and orexin A in patients with the binge-purging type of anorexia nervosa: preliminary study                                                | Conference abstract            |
| Tanaka et al. 2003b     | Eating pattern and the effect of oral glucose on ghrelin and insulin secretion in patients with anorexia nervosa                                                | Overlap Tanaka et al. 2003c    |
| Tanaka et al., 2003c    | Fasting plasma ghrelin levels in subtypes of anorexia nervosa                                                                                                   | Overlap Tanaka et al. 2003c    |
| Uehara et al., 2005     | Plasma des-acyl and acyl ghrelin in patients with eating disorders                                                                                              | Reported values not accessible |
| Wu et al, 2020          | Stress and Appetite Hormones in Predicting Binge Eating in Anorexia Nervosa: A Longitudinal Study                                                               | Conference abstract            |

List of reasons for exclusion of specific studies. In case of not accessible data attempts were made to contact contributing authors to provide data. 52% of attempts were successful. For others there was either no response or no valid email address available.

**Tabel S7: Data Extraction Table**

| Study                        | Gender | N (AN) | N (HC) | Subtype                | Age AN | Age HC | Diagnostic method | Method assay | Assay spec. | BMI AN | BMI HC | Design       | Samples              | Ghrelin Form        | Unit Ghrelin | Duration T2                                       | Quality Level* | Evidence level |
|------------------------------|--------|--------|--------|------------------------|--------|--------|-------------------|--------------|-------------|--------|--------|--------------|----------------------|---------------------|--------------|---------------------------------------------------|----------------|----------------|
| Bernardoni et al., 2020, AN  | F      | 94     | 119    | AN-R                   | 16.1   | 18.6   | DSM-5             | ELISA        | BioVendor   | 14.60  | 20.9   | CS           | AN, REC, HC          | deacyl              | pg/ml        | Baseline                                          | 7              | 3b             |
| Brambilla et al., 2007, T1   | F      | 10     | 10     | N/A                    | 23     | N/A    | DSM-IV            | RIA          | Phoenix     | 16.30  | 22.3   | R, DB PC     | AN T1, HC            | total               | pg/ml        | Baseline                                          | High           | 1b             |
| Brambilla et al., 2007, T2   | F      | 10     | 10     | N/A                    | 23     | N/A    | DSM-IV            | RIA          | Phoenix     | 16.67  | 22.3   | R, DB PC     | AN T2, HC            | total               | pg/ml        | 1 month                                           | High           | 1b             |
| Brambilla et al., 2007, T3   | F      | 10     | 10     | N/A                    | 23     | N/A    | DSM-IV            | RIA          | Phoenix     | 17.2   | 22.3   | R, DB PC     | AN T3, HC            | total               | pg/ml        | 2 months                                          | High           | 1b             |
| Brambilla et al., 2007, T4   | F      | 10     | 10     | N/A                    | 23     | N/A    | DSM-IV            | RIA          | Phoenix     | 17.5   | 22.3   | R, DB PC     | AN T4, HC            | total               | pg/ml        | 3 months                                          | High           | 1b             |
| Breithaupt et al., 2020      | F      | 36     | 20     | AN-R/AN-BP             | 19     | 18.4   | DSM-5             | ELISA        | Millipore   | N/A    | N/A    | CS           | AN(AN +Atypical), HC | total               | pg/ml        | Baseline                                          | 6              | 3b             |
| Broglio et al., 2004         | F      | 9      | 7      | AN-R                   | 24.2   | 30.6   | DSM-IV            | RIA          | Phoenix B   | 14.70  | 20.3   | CS/I         | AN, HC               | total               | ug/ml        | Baseline                                          | 5              | 3b             |
| Duriez et al., 2020, T1      | F      | 29     | N/A    | AN-R (59%)/AN-BP (41%) | 25.8   | N/A    | DSM-5             | EIA          | Bertin      | 14.60  | N/A    | I            | AN T1                | acyl, deacyl        | pg/ml        | Baseline                                          | 6              | 2b             |
| Duriez et al. 2020, T2       | F      | 28     | N/A    | AN-R (59%)/AN-BP (41%) |        | N/A    | DSM-5             | EIA          | Bertin      |        | N/A    | I            | AN T2                |                     | pg/ml        | partial weight recovery, 50-70% target BMI        | 6              | 2b             |
| Duriez et al., 2020, T3      | F      | 13     | N/A    | AN-R (59%)/AN-BP (41%) | 26.2   | N/A    | DSM-5             | EIA          | Bertin      | N/A    | N/A    | I            | AN T3                | acyl, deacyl        | pg/ml        | partial weight recovery 90% target BMI            | 6              | 2b             |
| Duriez et al., 2020, T4      | F      | 13     | N/A    | AN-R (59%)/AN-BP (41%) | 26     | N/A    | DSM-5             | EIA          | Bertin      | N/A    | N/A    | I            | AN T4                | acyl, deacyl        | pg/ml        | successful weight recovery 1 month post discharge | 6              | 2b             |
| Fazeli et al. 2018, T1       | F      | 12     | N/A    | N/A                    | 28.9   | N/A    | DSM-5             | ELISA        | Millipore   | 17.80  | N/A    | R controlled | AN T1                | total, acyl, deacyl | pg/ml        | Baseline                                          | High           | 2b             |
| Fazeli et al. 2018, T2       | F      | 12     | N/A    | N/A                    | 28.9   | N/A    | DSM-5             | ELISA        | Millipore   | 17.90  | N/A    | R controlled | AN T2                | total, acyl, deacyl | pg/ml        | 4 weeks after starting treatment                  | High           | 2b             |
| Fernandes-Aranda et al. 2016 | F      | 64     | 80     | AN-R (66%)/AN-BP (34%) | 24     | 22.6   | DSM-5             | ELISA        | Millipore   | 17.40  | 21.6   | CS           | AN, YHC, OHC, OB     | total               | N/A          | Baseline                                          | 7              | 3b             |

|                          |   |    |    |                      |       |       |        |                                 |            |       |       |              |                                          |                     |        |                                |      |    |
|--------------------------|---|----|----|----------------------|-------|-------|--------|---------------------------------|------------|-------|-------|--------------|------------------------------------------|---------------------|--------|--------------------------------|------|----|
| Germain et al., 2007     | F | 12 | 7  | N/A                  | 20.7  | 23    | DSM-IV | RIA                             | Phoenix B  | 15.20 | 20.4  | CS           | AN, THIN, HC                             | total               | pmol/L | Baseline                       | 6    | 3b |
| Germain et al., 2009     | F | 15 | 9  | AN-R                 | 20.4  | 23.1  | DSM-IV | ELISA                           | in-house   | 14.80 | 20.5  | CS/I         | AN, THIN, HC                             | total, acyl         | pg/ml  | Baseline                       | 6    | 3b |
| Grinspoon et al. 2004    | F | 68 | 20 | N/A                  | 25.4  | N/A   | DSM-IV | RIA                             | Phoenix B  | 15.90 | N/A   | R controlled | IFG-1, Estrogen, IGF-1+Estrogen, Placebo | total               | pg/ml  | Baseline                       | High | 1b |
| Haas et al., 2005, T1    | F | 57 | 49 | N/A                  | 25    | 25    | DSM-IV | RIA                             | In house   | 14.60 | 22.3  | CS           | AN T1                                    | total               | pmol/L | baseline                       | 8    | 3b |
| Haas et al., 2005, T2    | F | 19 | 49 | N/A                  | 25    | 25    | DSM-IV | RIA                             | In house   | 16.8  | 22.3  | CS           | AN T2                                    | total               | pmol/L | 34 days after first assessment | 8    | 3b |
| Haas et al., 2005, T3    | F | 19 | 49 | N/A                  | 25    | 25    | DSM-IV | RIA                             | In house   | 17.7  | 22.3  | CS           | AN T3                                    | total               | pmol/L | 84 days after first assessment | 8    | 3b |
| Harada et al., 2008      | F | 10 | 10 | AN-R                 | 21.9  | 23.5  | DSM-IV | ELISA                           | Mitsubishi | 13.43 | 21.6  | CS/I         | AN, HC                                   | acyl, deacyl        | pg/ml  | baseline                       | 4    | 3b |
| Heruc et al., 2019, T1   | F | 22 | 17 | N/A                  | 15.9  | 16.5  | DSM-5  | multiplex assay                 | Milliplex  | 18.10 | 22.50 | CS/I         | AN T1, HC                                | acyl                | pg/ml  | baseline                       | 6    | 3b |
| Heruc et al., 2019, T2   | F | 22 | 17 | N/A                  | 15.9  | 16.5  | DSM-5  | multiplex assay                 | Milliplex  | N/A   | N/A   | CS/I         | AN T2, HC                                | acyl                | pg/ml  | 2 weeks                        | 6    | 3b |
| Holsen et al., 2014, AN  | F | 13 | 12 | AN-R                 | 21.8  | 21.6  | DSM-IV | RIA                             | LINCO      | 18.10 | 22.5  | CS           | AN, REC, HC                              | acyl                | pg/ml  | baseline                       | 5    | 3b |
| Holsen et al., 2014, REC | F | 9  | 12 | N/A                  | 23.2  | 21.6  | DSM-IV | RIA                             | LINCO      | 22.20 | 22.5  | CS           | AN, REC, HC                              | acyl                | pg/ml  | at least 6 months              | 5    | 3b |
| Hotta et al., 2004       | F | 30 | 16 | AN-R(70%)/AN-BP(30%) | 24    | 25.6  | DSM-IV | ICT-EIA (total ghrelin) + ELISA | LINCO      | 15.54 | 20.28 | CS/I         | AN, HC                                   | total, acyl, deacyl | nmol/L | baseline                       | 6    | 3b |
| Korek et al., 2013       | F | 18 | 17 | N/A                  | 20-35 | 19-25 | N/A    | RIA                             | Millipore  | 16.50 | 21.1  | CS/I         | AN, OB, HC                               | total, acyl         | pg/ml  | baseline                       | 4    | 3b |
| Koyama et al., 2010, T1  | F | 5  | 10 | AN-R                 | 22.4  | 25.2  | DSM-IV | ELISA                           | Mitsubishi | 12.17 | 20.97 | CS/I         | AN T1, HC                                | acyl, deacyl        | pg/ml  | baseline                       | 6    | 3b |
| Koyama et al., 2010, T2  | F | 5  | 10 | AN-R                 | 22.7  | 25.2  | DSM-IV | ELISA                           | Mitsubishi | 13.93 | 20.97 | CS/I         | AN T2, HC                                | acyl, deacyl        | pg/ml  | 8 weeks                        | 6    | 3b |
| Krsek et al. 2003        | F | 16 | 13 | N/A                  | 26.6  | 29.2  | DSM-IV | RIA                             | Phoenix CA | 15.20 | 20.7  | CS           | AN, HC, Short bowel syndrome             | total               | ng/L   | baseline                       | 5    | 3b |
| Lanyi et al., 2012       | F | 11 | 10 | N/A                  | 19.3  | 19.6  | DSM-IV | RIA                             | LINCO      | 17.10 | 22.2  | CS           | AN, OB, HC                               | total               | ng/L   | baseline                       | 5    | 3b |

|                                  |     |    |     |                        |       |             |                 |       |            |       |       |      |                |              |         |                                       |   |    |
|----------------------------------|-----|----|-----|------------------------|-------|-------------|-----------------|-------|------------|-------|-------|------|----------------|--------------|---------|---------------------------------------|---|----|
| Lawson et al., 2011              | F   | 16 | 20  | N/A                    | 25.9  | 27.3        | DSM-IV          | RIA   | LINCO      | 18.2  | 22.3  | CS   | AN, HC, OB, NW | total        | pg/ml   | baseline                              | 5 | 3b |
| Mancuso et al., 2019             | F   | 36 | 32  | AN-R(69%)/AN-BP (31%)  | 19.6  | 17.5        | K-SADS-PL + EDE | ELISA | Millipore  | 17    | 21.3  | CS/I | AN, HC         | total        | pg/ml   | baseline                              | 6 | 3b |
| Misra et al., 2008               | F   | 34 | 33  | N/A                    | 15.9  | 15          | DSM-IV          | RIA   | Phoenix B  | 16.60 | 22.3  | CS   | AN, HC         | No           | pg/ml   | baseline                              | 7 | 3b |
| Monteleone et al. 2016, AN       | F/M | 7  | 7   | AN-R (71%)/AN-BP (29%) | 24    | 25.2        | DSM-IV          | EIA   | Phoenix B  | 15.90 | 22.07 | CS   | AN, HC         | total        | ng/ml   | baseline                              | 5 | 3b |
| Monteleone et al. 2016, REC      | F   | 7  | 7   | AN-R (71%)/AN-BP (29%) | 23.7  | 25.2        | DSM-IV          | EIA   | Phoenix B  | 19.40 | 22.07 | CS   | AN-REC, HC     | total        | ng/ml   | 2-14 weeks normal BMI                 | 5 | 3b |
| Monteleone et al., 2008a         | F   | 20 | 20  | AN-R(35%)/AN-BP (65%)  | 23.7  | 23.6        | DSM-IV          | RIA   | Phoenix B  | 16.40 | 21.1  | CS   | AN, BN, HC     | total        | pg/ml   | baseline                              | 5 | 3b |
| Monteleone et al., 2008b         | F   | 8  | 8   | AN-R(25%)/AN-BP (75%)  | 23.7  | 22.1        | DSM-IV          | RIA   | Phoenix B  | 16.40 | 21.3  | CS   | AN, HC         | total        | pg/ml   | baseline                              | 6 | 3b |
| Nakahara et al., 2007, T1        | F   | 14 | 12  | AN-R                   | 24.6  | 25.7        | DSM-IV          | RIA   | In-hous    | 12.40 | 22.3  | CS/I | AN T1, HC      | total        | pmol/L  | baseline                              | 6 | 3b |
| Nakahara et al., 2007, T2        | F   | 14 | 12  | AN-R                   | 24.6  | 25.7        | DSM-IV          | RIA   | In-house   | 16.8  | 22.3  | CS/I | AN T2, HC      | total        | pmol/L  | 86 (+/- 26 days) days after admission | 6 | 3b |
| Nakahara et al., 2008            | F   | 11 | 11  | AN-R                   | 27.7  | 24.6        | DSM-IV          | RIA   | In-house   | 12.40 | 21.8  | CS   | AN, OB, HC     | acyl, deacyl | fmol/ml | baseline                              | 6 | 3b |
| Nakai et al., 2003               | F   | 5  | 7   | AN-R                   | N/A   | age-matched | DSM-IV          | RIA   | In-house   | 13.90 | 20.4  | CS/I | AN, HC         | acyl         | fmol/ml | baseline                              | 6 | 3b |
| Nedvidkova et al., 2003, T1      | F   | 5  | 6   | N/A                    | 24.3  | 23          | DSM-IV          | RIA   | Phoenix B  | 15.20 | 21.6  | CS/I | AN T1, HC      | total        | pg/ml   | baseline                              | 5 | 3b |
| Nogueira et al., 2013, T1        | F   | 10 | 11  | AN-R                   | 21.9  | 24.6        | DSM-IV          | ELISA | BioVendor  | 13.10 | 22.3  | CS/I | AN T1, HC      | deacyl       | pg/ml   | baseline                              | 5 | 3b |
| Ogiso et al. 2011                | F   | 7  | 8   | AN-R                   | 19.3  | 19          | DSM-IV          | ELISA | Mitsubishi | 13.02 | 21.57 | CS   | AN, HC         | acyl, deacyl | fmol/ml | baseline                              | 6 | 3b |
| Otto et al., 2001, T1            | F   | 36 | 24  | N/A                    | 25    | 22.9        | N/A             | RIA   | Phoenix B  | 15.20 | 21.9  | CS/I | AN T1, HC      | total        | pg/ml   | baseline                              | 7 | 3b |
| Otto et al., 2001, T2            | F   | 36 | 24  | N/A                    | 25    | 22.9        | N/A             | RIA   | Phoenix B  | 17.4  | 21.9  | CS/I | AN T2, HC      | total        | pg/ml   | discharge 66+/- 25 days               | 7 | 3b |
| Paslakis et al., 2019            | F   | 51 | 106 | AN-R (66%)/AN-BP (33%) | 27.4  | 27.2        | DSM-5           | ELISA | Millipore  | 17.44 | 21.7  | CS   | AN, HC         | total        | pg/ml   | baseline                              | 6 | 3b |
| Rigamonti et al., 2002           | F   | 6  | 12  | N/A                    | 17-18 | 27-39       | DSM-IV          | RIA   | Phoenix B  | 13.1  | 21.1  | CS   | AN, OB, HC     | total        | pg/ml   | baseline                              | 4 | 3b |
| Simon et al., 2020               | F   | 24 | 28  | AN-R (83%)/AN-BP (17%) | 23.5  | 24.6        | DSM-5           | ELISA | Millipore  | 15.48 | 21.87 | CS   | AN, HC, OB     | acyl         | pg/ml   | baseline                              | 7 | 3b |
| Soriano-Guillen et al., 2004, T1 | F   | 16 | 20  | N/A                    | 17    | 17.3        | DSM-IV          | RIA   | Phoenix B  | -2.20 | 0.3   | CS/I | AN T1, OB, HC  | total        | pg/ml   | baseline                              | 5 | 3b |

|                                    |                 |    |    |             |             |      |        |       |           |       |       |      |                      |       |        |                         |   |    |
|------------------------------------|-----------------|----|----|-------------|-------------|------|--------|-------|-----------|-------|-------|------|----------------------|-------|--------|-------------------------|---|----|
| Soriano-Guillen et al., 2004, T2   | F               | 16 | 20 | N/A         | 17          | 17.3 | DSM-IV | RIA   | Phoenix B | -1    | 0.3   | CS/I | AN T2, OB, HC        | total | pg/ml  | 25% of BMI at admission | 5 | 3b |
| Soriano-Guillen et al., 2004, T3   | F               | 16 | 20 | N/A         | 18          | 17.3 | DSM-IV | RIA   | Phoenix B | -0.58 | 0.3   | CS/I | AN T3, OB, HC        | total | pg/ml  | 1 year                  | 5 | 3b |
| Stengel et al., 2013               | AN (F); HC(F/M) | 8  | 8  | N/A         | 26.1        | 48.5 | ICD-10 | ELISA | Phoenix   | 12.6  | 22.6  | CS   | AN, HC, OB           | total | ng/ml  | baseline                | 5 | 3b |
| Stock et al., 2005                 | F               | 10 | 10 | AN-R        | 16.5        | 14.8 | DSM-IV | RIA   | Phoenix B | 16.30 | 20.2  | CS   | AN, HC, OB           | total | pg/ml  | baseline                | 5 | 3b |
| Stojilkkovic-Drobnjak et al., 2019 | F               | 11 | 15 | N/A         | pre (40-60) |      | DSM-IV | ELISA | MSD       | 20.60 | 22.1  | CS   | REC, HC              | acyl  | pg/ml  | 28 years                | 6 | 3b |
| Stoving et al., 2007, BP           | F               | 7  | 24 | AN-BP       | 26          | 29.9 | DSM-IV | RIA   | In-house  | 15.00 | 23.6  | CS   | AN-R, AN-BP, REC, HC | total | ug/L   | baseline                | 7 | 3b |
| Stoving et al., 2007, R            | F               | 20 | 24 | AN-R        | 27.6        | 29.9 | DSM-IV | RIA   | In-house  | 15.30 | 23.6  | CS   | AN-R, AN-BP, REC, HC | total | ug/L   | baseline                | 7 | 3b |
| Stoving et al., 2007, REC          | F               | 10 | 24 | N/A         | 23.9        | 29.9 | DSM-IV | RIA   | In-house  | 20.10 | 23.6  | CS   | AN-R, AN-BP, REC, HC | total | ug/L   | at least 6 months       | 7 | 3b |
| Tanaka et al., 2003c, BP           | F               | 19 | 15 | AN-BP       | 24.6        | 22.1 | DSM-IV | RIA   | In-house  | 13.80 | 21.4  | CS/I | AN-BP, BN, HC        | total | pmol/L | baseline                | 6 | 3b |
| Tanaka et al., 2003c, R            | F               | 21 | 15 | AN-R        | 21.8        | 22.1 | DSM-IV | RIA   | In-house  | 13.30 | 21.4  | CS/I | AN-R, BN, HC         | total | pmol/L | baseline                | 6 | 3b |
| Tanaka et al., 2004, BP T1         | F               | 13 | 9  | AN-BP       | 25          | 21.9 | DSM-IV | RIA   | In-house  | 14.50 | 21.5  | CS/I | E-AN, AN-BP T1, HC   | total | pmol/L | baseline                | 6 | 3b |
| Tanaka et al., 2004, BP T2         | F               | 13 | 9  | AN-BP       | 25          | 21.9 | DSM-IV | RIA   | In-house  | 15.30 | 21.5  | CS/I | E-AN, AN-BP T2, HC   | total | pmol/L | 15-42 days              | 6 | 3b |
| Tanaka et al., 2004, BP T3         | F               | 13 | 9  | AN-BP       | 25          | 21.9 | DSM-IV | RIA   | In-house  | 16.20 | 21.5  | CS/I | E-AN, AN-BP T3, HC   | total | pmol/L | discharge               | 6 | 3b |
| Tanaka et al., 2004, R T1          | F               | 14 | 9  | AN-R        | 18.4        | 21.9 | DSM-IV | RIA   | In-house  | 13.10 | 21.5  | CS/I | E-AN, AN-R T1, HC    | total | pmol/L | baseline                | 6 | 3b |
| Tanaka et al., 2004, R T2          | F               | 14 | 9  | AN-R        | 18.4        | 21.9 | DSM-IV | RIA   | In-house  | 13.90 | 21.5  | CS/I | E-AN, AN-R T2, HC    | total | pmol/L | 15-42 days              | 6 | 3b |
| Tanaka et al., 2004, R T3          | F               | 14 | 9  | AN-R        | 18.4        | 21.9 | DSM-IV | RIA   | In-house  | 15.10 | 21.5  | CS/I | E-AN, AN-R T3, HC    | total | pmol/L | discharge               | 6 | 3b |
| Terra et al., 2013                 | F               | 28 | 33 | AN-R        | 32.6        | 27.4 | DSM-IV | EIA   | LINCO     | 16.80 | 21.8  | CS/I | AN, HC               | total | ng/ml  | baseline                | 6 | 3b |
| Tolle et al., 2003, T1             | F               | 9  | 10 | AN-R        | 17.2        | 23.2 | DSM-IV | RIA   | Phoenix B | 14.60 | 21.5  | CS/I | AN T1, THIN, HC      | total | ng/L   | baseline                | 6 | 3b |
| Tolle et al., 2003, T2             | F               | 9  | 10 | AN-R        | 17.2        | 23.2 | DSM-IV | RIA   | Phoenix B | 17.90 | 21.5  | CS/I | AN T2, THIN, HC      | total | ng/L   | N/A                     | 6 | 3b |
| Troisi et al., 2005                | F               | 15 | 23 | AN-R(91%)/A | 26.7        | 25.6 | DSM-IV | RIA   | LINCO     | 15.97 | 21.24 | CS   | AN, BN,              | total | pg/ml  | baseline                | 7 | 3b |

|                          |   |    |    | N-BP<br>(9%) |      |      |        |       |            |       |       |      | BED,<br>HC        |                  |       |           |   |    |
|--------------------------|---|----|----|--------------|------|------|--------|-------|------------|-------|-------|------|-------------------|------------------|-------|-----------|---|----|
| Uehara et al., 2011, T1  | F | 9  | 9  | AN-R         | 21.3 | 23.9 | DSM-IV | ELISA | Mitsubishi | 12.71 | 21.96 | CS/I | AN T1,<br>HC      | acyl,<br>desacyl | pg/ml | baseline  | 6 | 3b |
| Uehara et al., 2011, T2  | F | 9  | 9  | AN-R         | 21.4 | 23.9 | DSM-IV | ELISA | Mitsubishi | 13.99 | 21.96 | CS/I | AN T2,<br>HC      | acyl,<br>desacyl | pg/ml | 2-3 weeks | 6 | 3b |
| Westwater et al., 2020   | F | 22 | 30 | AN-BP        | 24.6 | 23.9 | DSM-5  | RIA   | Millipore  | 16.40 | 21.9  | CS   | AN,<br>BN, HC     | acyl             | pg/ml | baseline  | 5 | 3b |
| Wollenhaupt et al., 2019 | F | 10 | 10 | N/A          | 29.5 | 34.9 | DSM-5  | ELISA | Millipore  | 16.37 | 21.8  | CS   | AN,<br>BN,<br>BED | total            | pg/ml | baseline  | 5 | 3b |
| Zamrazilova et al., 2008 | F | 15 | 15 | AN-R         | 23.7 | 34.7 | DSM-IV | RIA   | LINCO      | 14.90 | 21.6  | CS   | AN,<br>OB, HC     | total            | ng/L  | baseline  | 6 | 3b |

Abbreviations: AN=Anorexia nervosa, AN-BP=Anorexia nervosa binge eating/purging subtype; AN-R=Anorexia nervosa restricting subtype; BED=Binge-eating disorder; BMI=Body Mass Index; BN=Bulimia nervosa; Bertin=Bertin Bioreagent, Montigny-le-Bretonneaux, France; CS=Cross-sectional; DB=Double-blind; DSM=Diagnostic and Statistical Manual of mental disorders; E-AN=Anorexia nervosa patient submitted to emergent hospitalization (not included in the meta-analysis); ELISA=Enzyme Linked Immuno Sorbent Assay; F=Female; HC=Healthy Controls; I=Intervention; L=Liter, LINCO= LINCO Research, St. Charles, MO, USA; M=male; Milliplex=Milliplex® MAP Human; Mitsubishi=Mitsubishi Kagaku Iatron, Tokyo, Japan; Millipore=Millipore, Billerica, MA, USA; ml=milliliter; MSD= MSD® Human Active Ghrelin Assay; Meso Scale Discovery, Gaithersburg, MD, USA; N=number of; N/A=Not applicable/not reported; ng=nanogram; NW= NW+hypothalamic amenorrhea; OB=Obesity; PC=Placebo controlled; pg=picogram; Phoenix Pharmaceuticals, Burlingame, CA, USA; Phoenix=Phoenix Pharmaceuticals, Mountain View, USA; Phoenix B=Phoenix Pharmaceuticals, Inc., Belmont, CA, USA; pre=premenopausal; R=Randomized; RIA=Radio Immuno Assay; T1=baseline measurement of AN patients at acute state (pretreatment); T2=1<sup>st</sup> follow up time point after baseline; T3=2<sup>nd</sup> follow-up time point after baseline; T4=3<sup>rd</sup> follow-up time point after baseline. \* Quality level was assessed with the Newcastle-Ottawa Quality Assessment Scale (NOS) or bias assessment through Cochrane collaboration for randomized placebo controlled trials;

**Table S8: Results of sensitivity analyses with varying rho**

|                                              | <b>Rho</b> | <b>.00</b> | <b>.20</b> | <b>.40</b> | <b>.60</b> | <b>.80</b> | <b>1.00</b> |
|----------------------------------------------|------------|------------|------------|------------|------------|------------|-------------|
| <b>A) Cross-sectional total ghrelin</b>      | Intercept  | 2.51       | 2.51       | 2.51       | 2.51       | 2.51       | 2.51        |
|                                              | Std. Error | 0.42       | 0.42       | 0.42       | 0.42       | 0.42       | 0.42        |
|                                              | Tau.sq     | 2.35       | 2.35       | 2.35       | 2.35       | 2.35       | 2.35        |
| <b>B) Cross-sectional acyl ghrelin</b>       | Intercept  | 2.02       | 2.02       | 2.02       | 2.02       | 2.02       | 2.02        |
|                                              | Std. Error | 0.40       | 0.40       | 0.40       | 0.40       | 0.40       | 0.40        |
|                                              | Tau.sq     | 1.26       | 1.26       | 1.26       | 1.26       | 1.26       | 1.26        |
| <b>C) Cross-sectional desacyl ghrelin</b>    | Intercept  | 3.60       | 3.60       | 3.60       | 3.60       | 3.60       | 3.60        |
|                                              | Std. Error | 0.80       | 0.80       | 0.80       | 0.80       | 0.80       | 0.80        |
|                                              | Tau.sq     | 3.55       | 3.55       | 3.55       | 3.55       | 3.55       | 3.55        |
| <b>D) Longitudinal T1T2 total ghrelin</b>    | Intercept  | 1.71       | 1.71       | 1.71       | 1.71       | 1.71       | 1.71        |
|                                              | Std. Error | 0.55       | 0.55       | 0.55       | 0.55       | 0.55       | 0.55        |
|                                              | Tau.sq     | 2.69       | 2.69       | 2.70       | 2.70       | 2.70       | 2.70        |
| <b>E) Cross-sectional T2HC total ghrelin</b> | Intercept  | 1.58       | 1.58       | 1.58       | 1.58       | 1.58       | 1.58        |
|                                              | Std. Error | 0.63       | 0.63       | 0.63       | 0.63       | 0.63       | 0.63        |
|                                              | Tau.sq     | 3.46       | 3.46       | 3.47       | 3.47       | 3.47       | 3.47        |
| <b>F) Longitudinal T1T2 acyl ghrelin</b>     | Intercept  | -0.24      | -0.24      | -0.24      | -0.24      | -0.24      | -0.24       |
|                                              | Std. Error | 0.28       | 0.28       | 0.28       | 0.28       | 0.28       | 0.28        |
|                                              | Tau.sq     | 0.29       | 0.29       | 0.29       | 0.29       | 0.29       | 0.29        |
| <b>G) Cross-sectional T2HC acyl ghrelin</b>  | Intercept  | 1.92       | 1.92       | 1.92       | 1.92       | 1.92       | 1.92        |
|                                              | Std. Error | 1.27       | 1.27       | 1.27       | 1.27       | 1.27       | 1.27        |
|                                              | Tau.sq     | 4.41       | 4.41       | 4.41       | 4.41       | 4.41       | 4.41        |

Results of sensitivity analysis of meta-analysis using robust variance estimation using a default rho of 0.8. Std. Error=Standard error; Tau.sq= Tau squared



**Table S9 Meta-regression models including age, assay type and quality of evidence**

|                                               | Covariate                          | Coefficient | p    |
|-----------------------------------------------|------------------------------------|-------------|------|
| <b>A) Cross-sectional total ghrelin</b>       | Mean Age                           | -0.05       | 0.68 |
|                                               | ELISA (EIA reference)              | 0.63        | 0.76 |
|                                               | RIA (EIA reference)                | 1.48        | 0.48 |
|                                               | Quality                            | -0.61       | 0.29 |
| <b>B) Cross-sectional acyl ghrelin</b>        | Mean Age                           | -0.29       | 0.47 |
|                                               | ELISA (EIA reference)              | 0.11        | 0.91 |
|                                               | RIA (EIA reference)                | -0.65       | 0.64 |
|                                               | Other (EIA reference)              | 0.36        | 0.91 |
|                                               | Quality                            | 0.01        | 0.99 |
| <b>C) Cross-sectional desacyl ghrelin</b>     | Mean Age                           | -0.38       | 0.44 |
|                                               | ELISA (EIA reference)              | 10.13       | 0.24 |
|                                               | RIA (EIA reference)                | 11.82       | 0.19 |
|                                               | Quality                            | -5.40       | 0.20 |
| <b>D) Longitudinal T1/T2 total ghrelin</b>    | Age at admission                   | -0.00       | 0.99 |
|                                               | RIA (ELISA reference) <sup>a</sup> | -           | -    |
|                                               | Quality                            | -1.04       | 0.25 |
| <b>E) Cross-sectional T2/HC total ghrelin</b> | Mean Age                           | -0.14       | 0.69 |
|                                               | RIA (ELISA reference)              | 2.07        | 0.44 |
|                                               | Quality                            | -0.50       | 0.76 |
| <b>F) Longitudinal T1/T2 acyl ghrelin</b>     | Age at admission                   | 0.28        | 0.30 |
|                                               | Other (ELISA reference)            | 1.23        | 0.30 |
|                                               | Quality <sup>b</sup>               | -0.85       | 0.26 |
|                                               | Duration to follow-up              | -0.01       | 0.82 |
| <b>G) Cross-sectional T2/HC acyl ghrelin</b>  | Mean Age                           | 0.00        | 0.99 |
|                                               | RIA (ELISA reference)              | 1.62        | 0.38 |
|                                               | Other (ELISA reference)            | 6.72        | 0.13 |
|                                               | Quality <sup>a</sup>               | -           | -    |

Results of meta-regression for all calculated meta-analyses. <sup>a</sup>All but one study (ELISA) used RIA for estimating ghrelin values. <sup>b</sup>All but one study had quality level 6.
